# Supplementary material for: Foetal hepatic progenitor cells assume a cholangiocytic cell phenotype during two-dimensional pre-culture
Source: PubMed Central journal article supplement (PMC4917868; doi:10.1038/srep28283), 2016-06-23

## **Foetal hepatic progenitor cells assume a cholangiocytic cell phenotype during two-dimensional pre-culture**

Kazuya Anzai, Hiromi Chikada, Kota Tsuruya, Kinuyo Ida, Tatehiro Kagawa, Yutaka Inagaki, Tesuya Mine, and Akihide Kamiya

### **Supplementary Figure Legends**

#### **Supplementary Figure 1**

Expansion and differentiation of foetal LPCs in 2D pre-culture. Primary cells and cultured cells, which were 2D pre-cultured for 1 day, 3 days or 5 days, were stained with antibodies against a cholangiocytic marker *CK19* or a proliferation marker *Ki-67*. Nuclei were stained with DAPI. Scale bars, 100  $\mu$ m.

#### **Supplementary Figure 2**

Number of cells before and after 7 days pre-culture. Primary E13 LPCs were inoculated onto gelatine-coated culture plates ( $1 \times 10^5$  cells per well of a 24-well culture plate or  $2 \times 10^5$  primary cells per well of a 12-well culture plate). Cells were cultured for 7 days and the number of cells was counted. Results are presented as mean  $\pm$  SEM. Statistical analysis was performed with Student's *t*-test. n=40 (24-well plates) and n=9 (12-well plates).

#### **Supplementary Figure 3**

Flow cytometric analysis to LPCs pre-cultured with or without cytokines. The expression of PE-tagged antigens was hardly influenced by the addition of cytokines, but the expression of CD133 decrease under the stimuli of OSM or HGF.

#### **Supplementary Figure 4**

Expression of cell signalling receptors during *in vitro* cholangiocytic formation. (Upper panel)

Expression of ErbB family genes of primary cells, cultured cells, and cysts derived from cultured cells were analysed by using quantitative RT-PCR. (Lower panel) Expression of the Lgr family genes of primary cells and cysts derived from cultured cells were analysed by using quantitative RT-PCR. Expression level of primary cells was set to 1.0. Mock, cells were pre-cultured without cytokines.

### **Supplementary Figure 5**

Cysts derived from neonatal CD133<sup>+</sup> cells expressed *HNF4α* and *Ki-67*. Cysts were stained with anti-*HNF4α* and *Ki-67* antibodies. Arrowheads indicate *Ki-67*-positive cells. Scale bars, 100 μm.

### **Supplementary Figure 6**

Colony formation assay of E13 foetal LPCs and CD133<sup>+</sup> neonatal liver cells. Progenitor cells were purified from E13 and neonatal livers. Primary E13 LPCs, E13 LPCs pre-cultured on gelatine-coated dishes, and neonatal progenitor cells were cultured on MEF feeder cells. Resulting colonies were stained with anti-*ALB* and -*CK19* antibodies (left panel). Isotype control (right panel). Red, *ALB*; green, *CK19*. (i) Colonies derived from primary E13 CD133<sup>+</sup> LPCs. (ii) Colonies derived from E13 CD133<sup>+</sup> pre-cultured LPCs. (iii) Colonies derived from CD133<sup>+</sup> neonatal liver cells.

**Supplementary Table S1** Cell surface antigens for flow cytometric analysis

|        | Fluorescent Conjugate | Catalogue Number | Isotype              | Company     |
|--------|-----------------------|------------------|----------------------|-------------|
| CD9    | PE                    | 124805           | Rat IgG2a            | BioLegend   |
| CD24   | PE                    | 101807           | Rat IgG2b            |             |
| CD26   | PE                    | 137803           | Rat IgG2a            |             |
| CD29   | PE                    | 102207           | American Hamster IgG |             |
| CD47   | PE                    | 127507           | Rat IgG2a            |             |
| CD54   | PE                    | 116107           | Rat IgG2b            |             |
| CD63   | PE                    | 143903           | Rat IgG2a            |             |
| CD73   | PE                    | 127205           | Rat IgG1             |             |
| CD81   | PE                    | 104905           | American Hamster IgG |             |
| CD98   | PE                    | 128207           | Rat IgG2a            |             |
| CD106  | PE                    | 105713           | Rat IgG2a            |             |
| CD121a | PE                    | 113505           | American Hamster IgG |             |
| CD147  | PE                    | 123707           | Rat IgG1             |             |
| CD262  | PE                    | 119905           | American Hamster IgG |             |
| CD276  | PE                    | 135605           | Rat IgG2a            |             |
| CD326  | PE                    | 118205           | Rat IgG2a            |             |
| CD44   | FITC                  | 11-0441          | Rat IgG2b            | eBioscience |

**Supplementary Table S2** Primary antibodies for immunohistochemistry

| Antibody                          | Company                        | Catalogue Number | Host Animal | Dilution |
|-----------------------------------|--------------------------------|------------------|-------------|----------|
| <i>ALBUMIN</i>                    | Bethyl laboratory              | A90-134A         | goat        | 1:500    |
| <i>CK19</i>                       | Miyajima et al.                | -                | rabbit      | 1:2000   |
| <i><math>\beta</math>-CATENIN</i> | BD Pharmingen                  | 610154           | mouse       | 1:1000   |
| <i><math>\alpha</math>PKC</i>     | SantaCruz<br>Biotechnology Inc | sc-216           | rabbit      | 1:250    |
| <i>HNF4<math>\alpha</math></i>    | SantaCruz<br>Biotechnology Inc | sc-6556          | goat        | 1:400    |
| <i>Ki-67</i>                      | Abcam                          | 15580            | rabbit      | 1:500    |

**Supplementary Table S3** Primer sequences for quantitative PCR analysis

| Gene name                     |           | Sequence                       | Probe number |
|-------------------------------|-----------|--------------------------------|--------------|
| <i>Hprt</i>                   | Sense     | 5'-TCCTCCTCAGACCGCTTTT-3'      | #95          |
|                               | Antisense | 5'-CCTGGTTCATCATCGCTAATC-3'    |              |
| <i>Albumin</i>                | Sense     | 5'-AGTGTTGTGCAGAGGCTGAC-3'     | #27          |
|                               | Antisense | 5'-TTCTCCTTCACACCATCAAGC-3'    |              |
| <i>Ck19</i>                   | Sense     | 5'-TGACCTGGAGATGCAGATTG-3'     | #17          |
|                               | Antisense | 5'-CCTCAGGGCAGTAATTCCTC-3'     |              |
| <i>Hnf1<math>\beta</math></i> | Sense     | 5'-ATGGCTCCCCTCACCATC-3'       | #55          |
|                               | Antisense | 5'-GGTTGTAGCGCACTCCTGA-3'      |              |
| <i>Hnf6</i>                   | Sense     | 5'-GGAGTTCAGCGCATGTC-3'        | #64          |
|                               | Antisense | 5'-CGACGTTGGACGTCTGTG-3'       |              |
| <i>Tat</i>                    | Sense     | 5'-GGAGGAGGTCGCTTCCTATT-3'     | #82          |
|                               | Antisense | 5'-GCCACTCGTCAGAATGACATC-3'    |              |
| <i>Cyp3a11</i>                | Sense     | 5'-GGGACTCGTAAACATGAACTTTTT-3' | #53          |
|                               | Antisense | 5'-CCATGTGCAATTTCCATAAACC-3'   |              |
| <i>Grhl2</i>                  | Sense     | 5'-CCACAGAGCATACTGCCAGA-3'     | #32          |
|                               | Antisense | 5'-TCTCTTCATCCCGATTTTTC-3'     |              |
| <i>Ck7</i>                    | Sense     | 5'-GGAGATGGCCAACCACAG-3'       | #41          |
|                               | Antisense | 5'-GGCCTGGAGTGTCTCAAACCTT-3'   |              |
| <i>Cftr</i>                   | Sense     | 5'-CAGCAGCTCAAACAACTGGA-3'     | #51          |
|                               | Antisense | 5'-TGTCACAAGGTGGGTGAAAA-3'     |              |
| <i>Sox9</i>                   | Sense     | 5'-CAGCAAGACTCTGGGCAAG-3'      | #66          |
|                               | Antisense | 5'-TCCACGAAGGGTCTCTTCTC-3'     |              |

| Gene name           |           | Sequence                         | Probe number |
|---------------------|-----------|----------------------------------|--------------|
| <i>Lgr4</i>         | Sense     | 5'-CAGTTACCAGAAGATGCATTTAAGAA-3' | #20          |
|                     | Antisense | 5'-CAAGGCTTTTGGGTGGATAA-3'       |              |
| <i>Lgr5</i>         | Sense     | 5'-CTTCACTCGGTGCAGTGCT-3'        | #60          |
|                     | Antisense | 5'-CAGCCAGCTACCAAATAGGTG-3'      |              |
| <i>Lgr6</i>         | Sense     | 5'-AGCTTCAGCCGGGTCTCT-3'         | #17          |
|                     | Antisense | 5'-AGAGGTGGTTCCTGAGAGC-3'        |              |
| <i>ErbB1</i>        | Sense     | 5'-GCCACGCCAACTGTACCTAT-3'       | #107         |
|                     | Antisense | 5'-GCCACACTTCACATCCTTGA-3'       |              |
| <i>ErbB2 (Her2)</i> | Sense     | 5'-TCAACTGCACCCACTCATGT-3'       | #85          |
|                     | Antisense | 5'-CTGGCTCTCTGCTCTGCTG-3'        |              |
| <i>ErbB3</i>        | Sense     | 5'-CTGCCACGAGAACTGCAC-3'         | #93          |
|                     | Antisense | 5'-TGCTTGGCCTAAACAGTCTTG-3'      |              |
| <i>ErbB4</i>        | Sense     | 5'-AATGCTGATGGTGGCAAGA-3'        | #21          |
|                     | Antisense | 5'-CATCACTTTGATGTGTGAATTTCC-3'   |              |

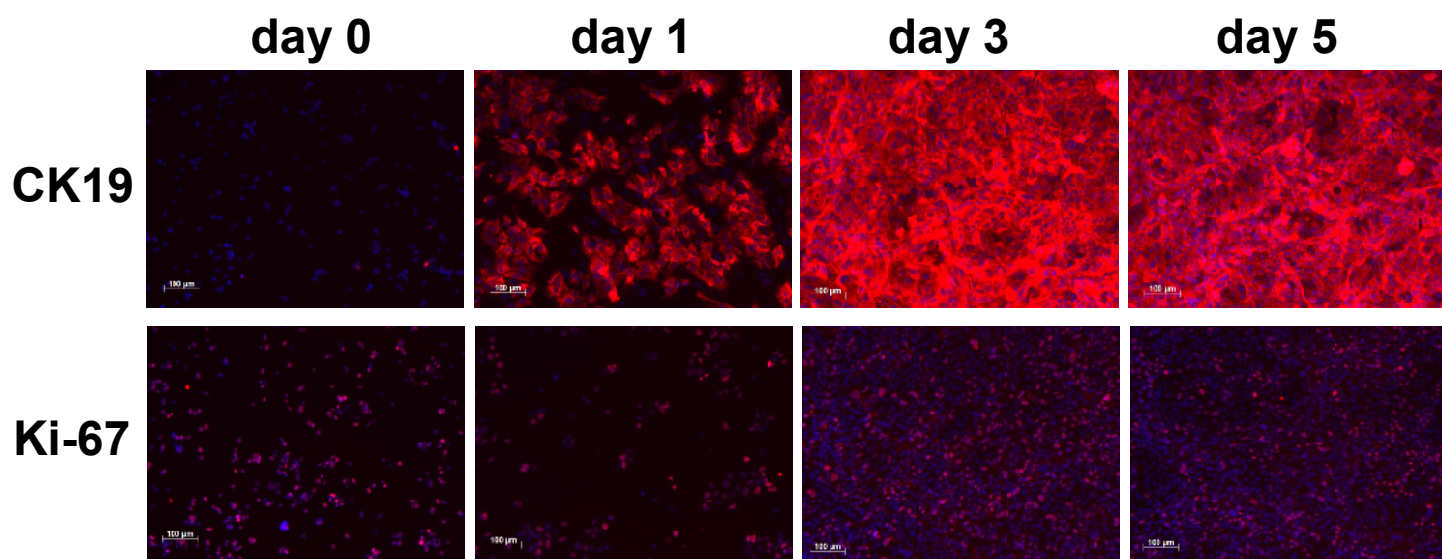

Anzai et al., Supplementary Figure 1

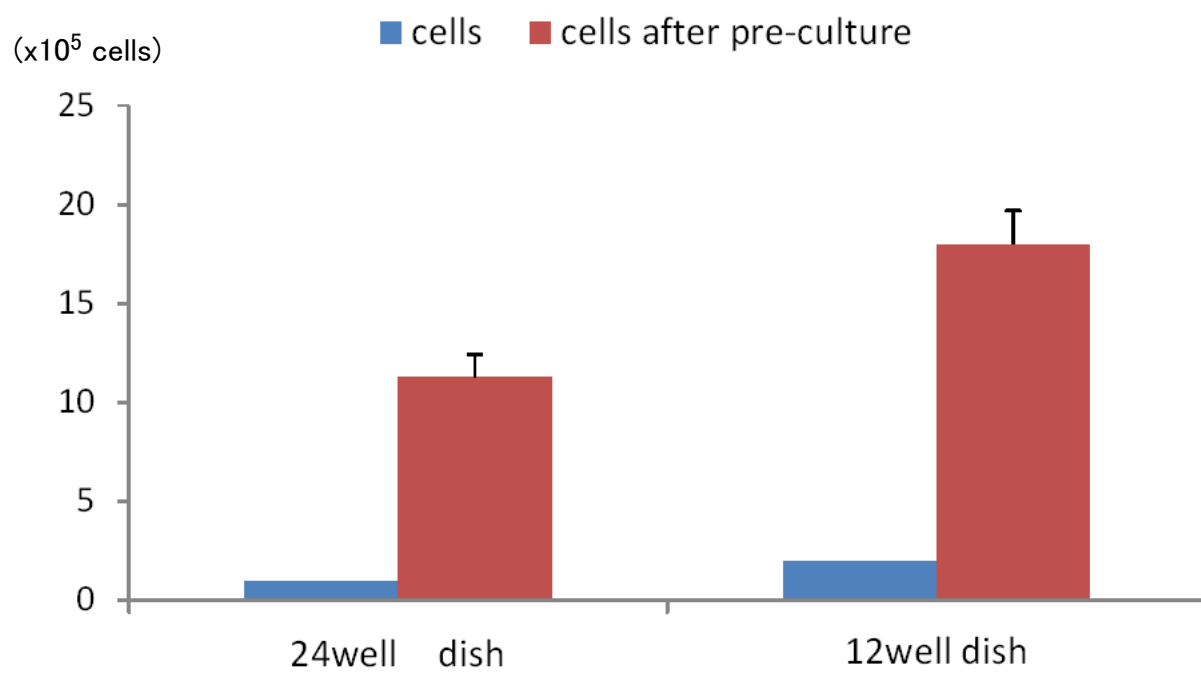

**Anzai et al., Supplementary Figure 2**



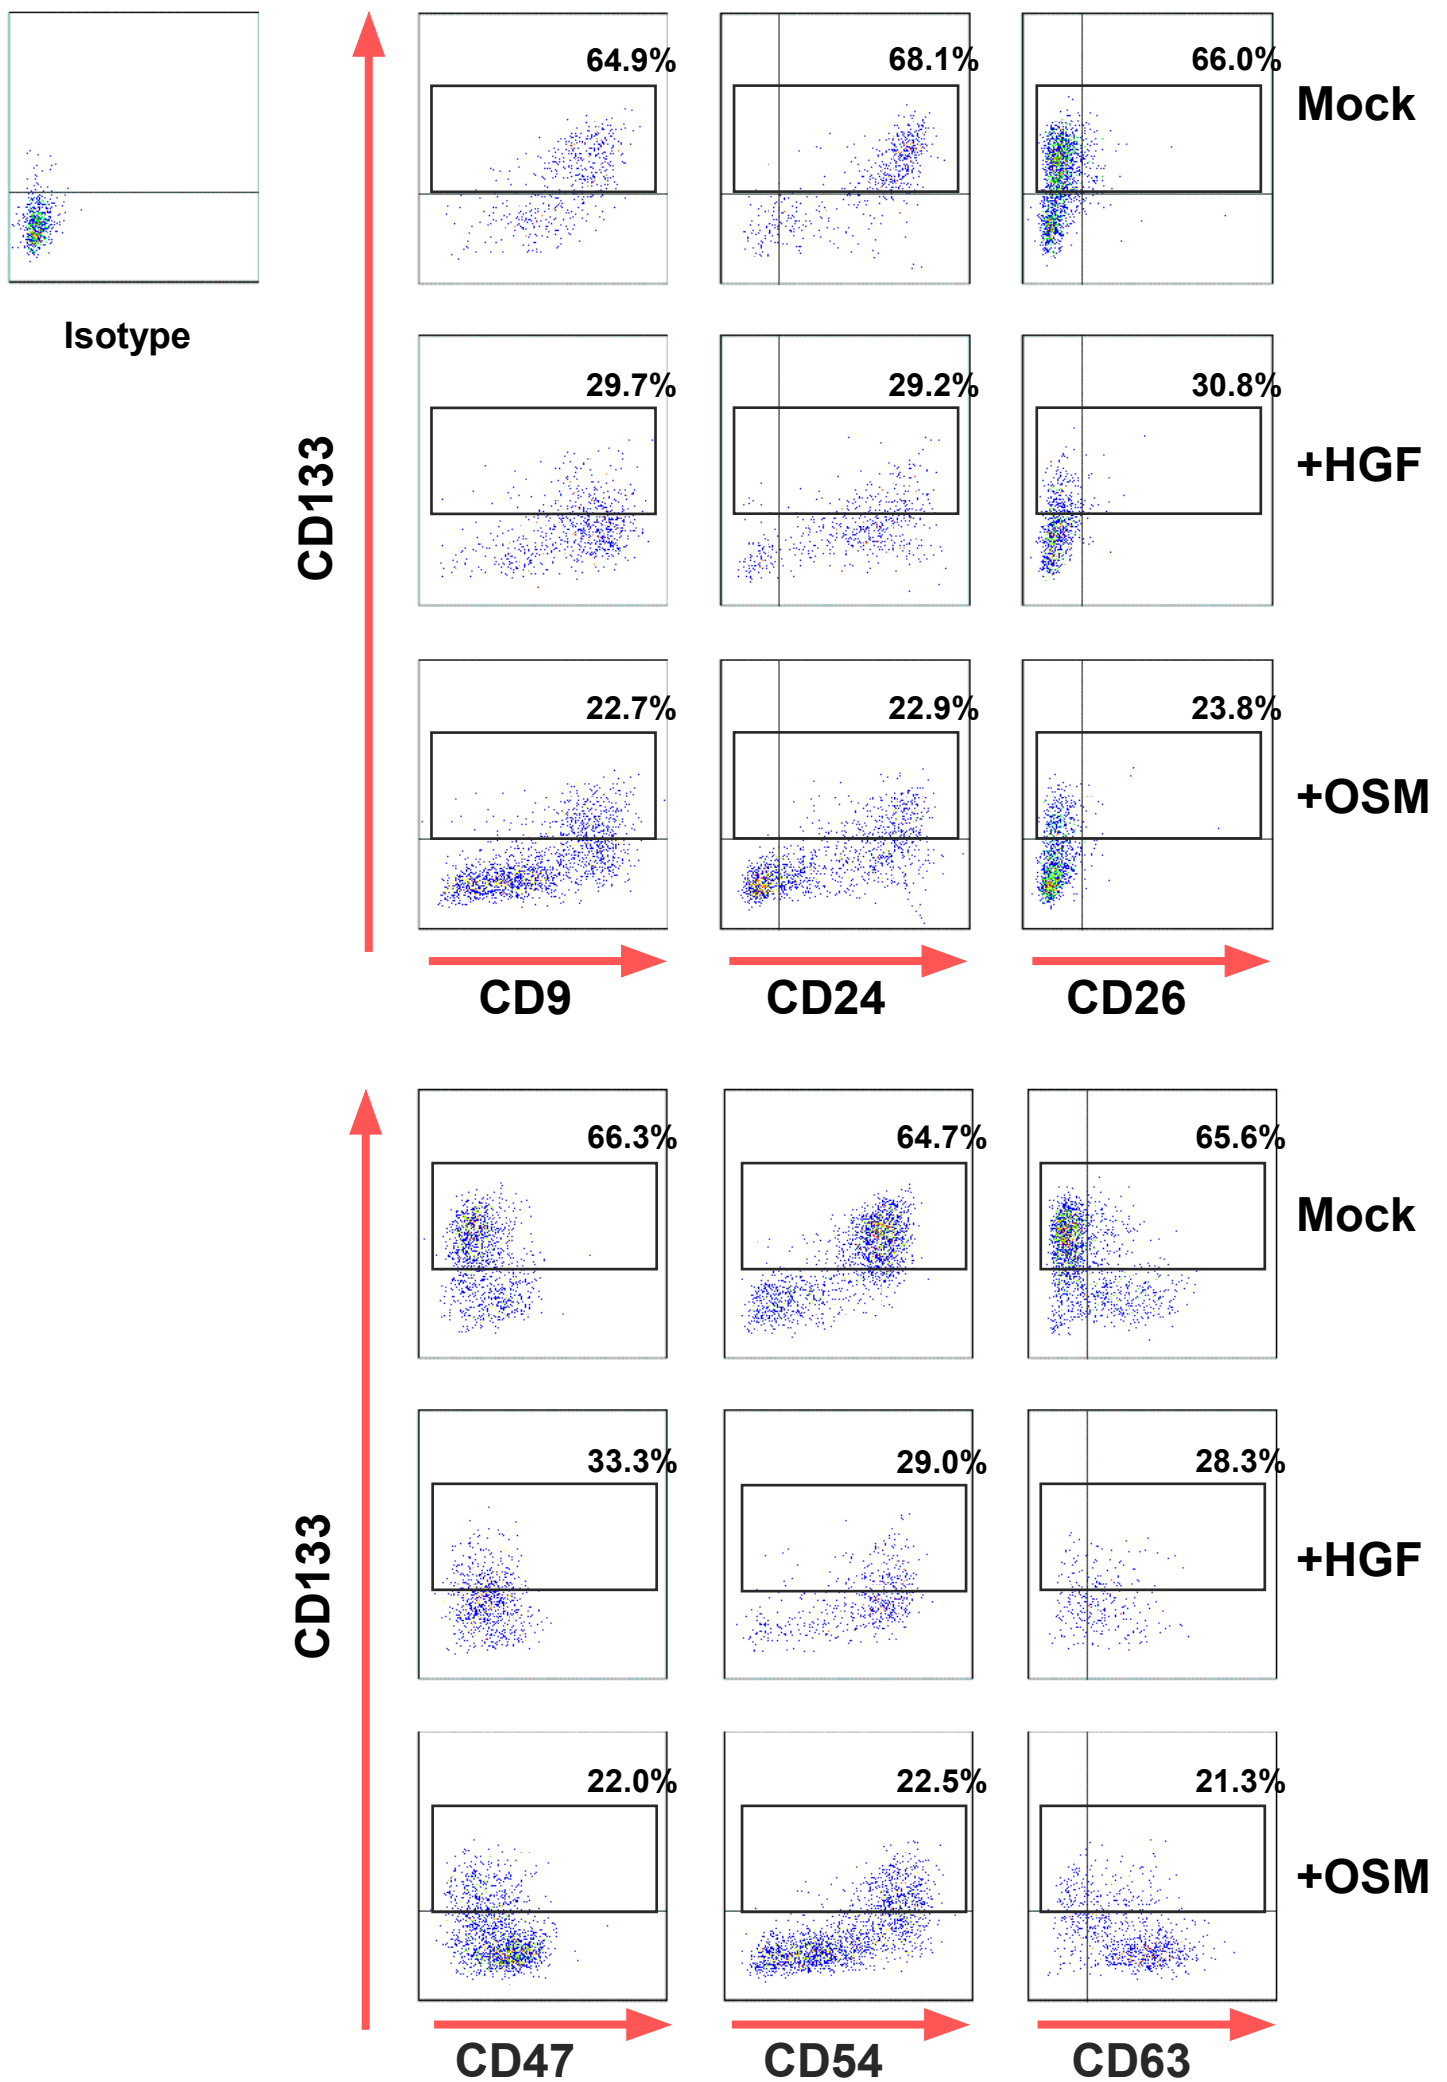

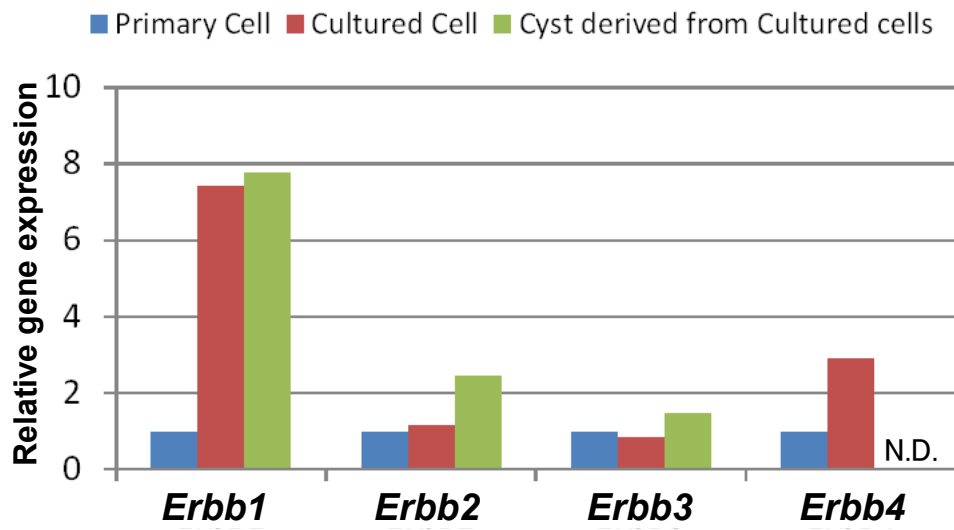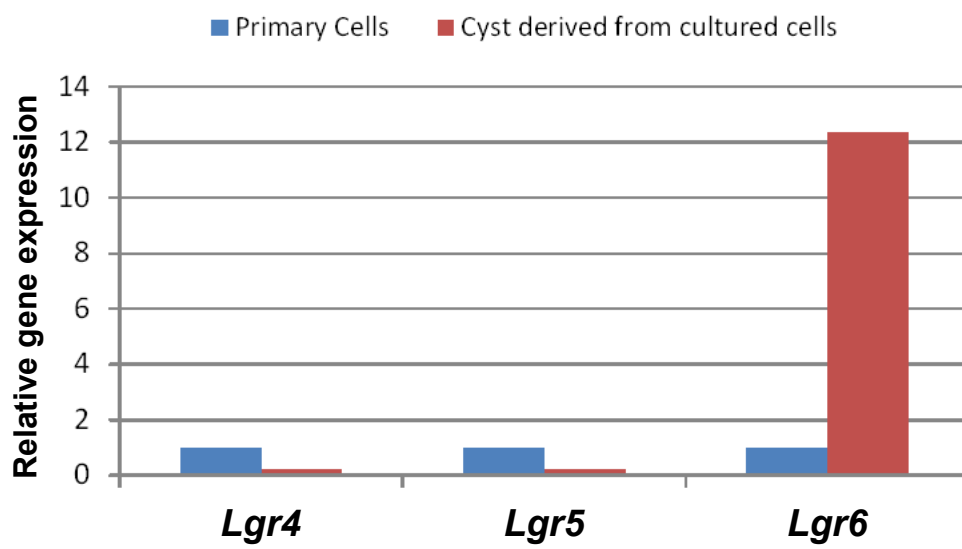

Anzai et al., Supplementary Figure 4

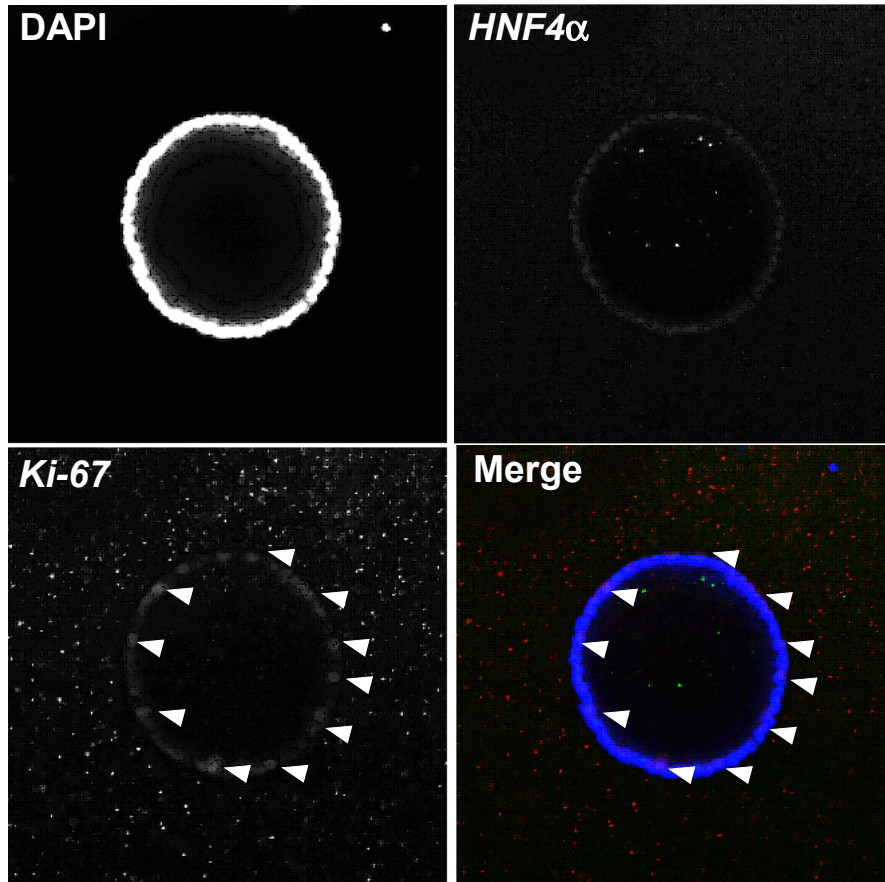

Anzai et al., Supplementary Figure 5

(i)

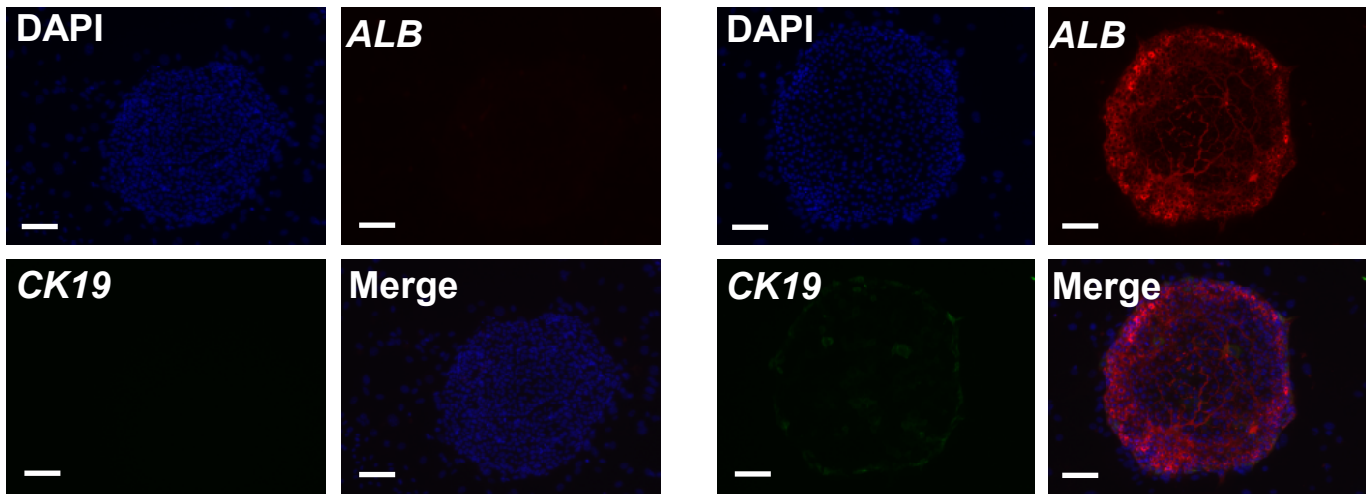

(ii)

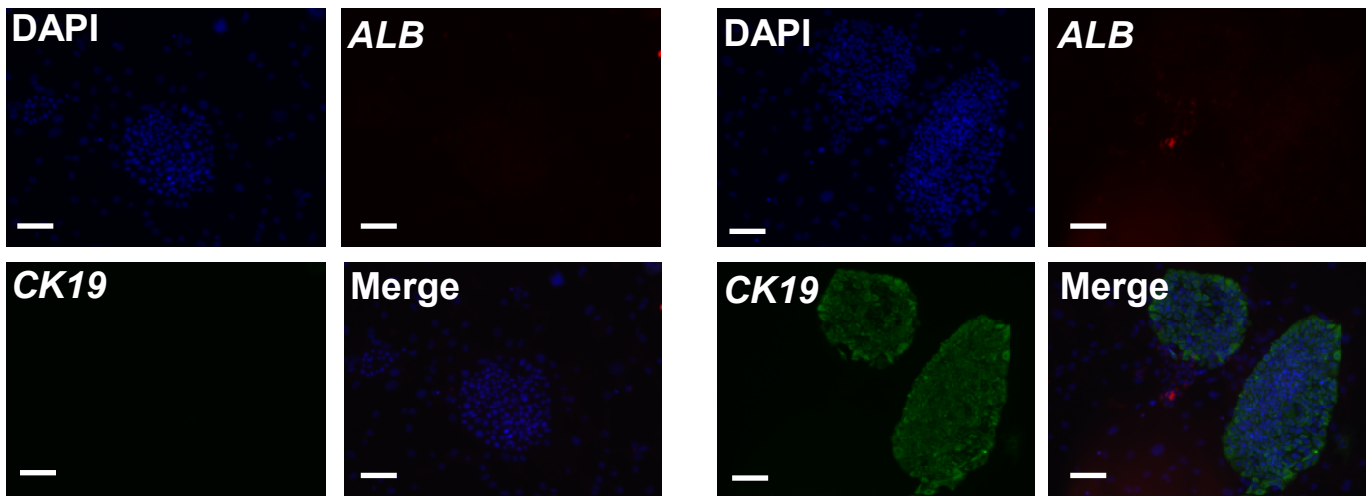

(iii)

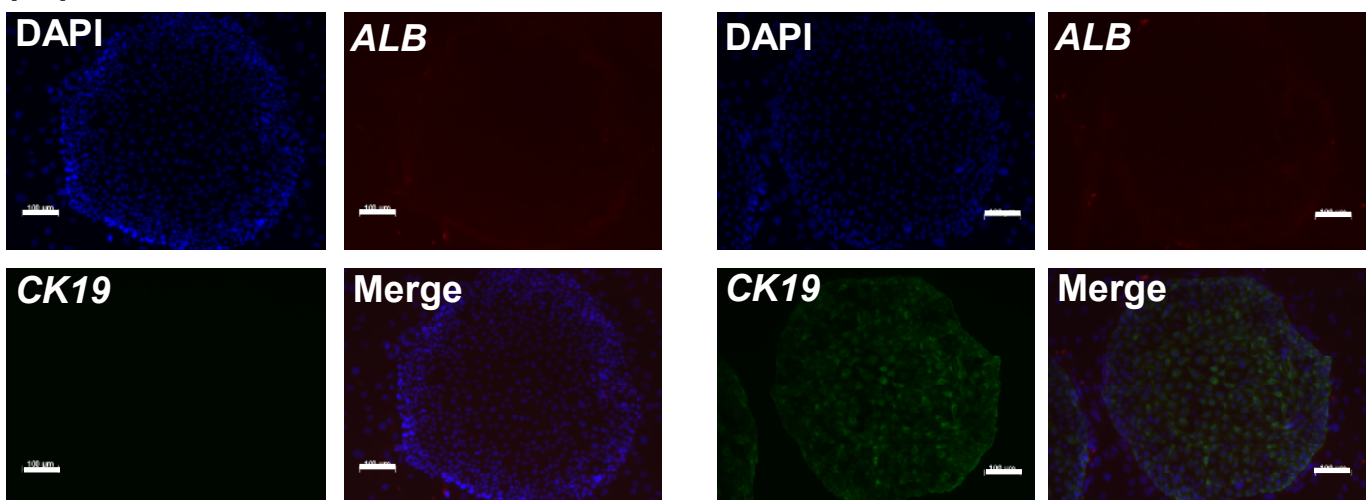

Supplement: srep28283-s1.pdf [file srep28283-s1.pdf]
